# Supplementary material for: Rapid electrodeposition of Cu nanoparticle film on Ni foam as an integrated 3D free-standing electrode for non-invasive and non-enzymatic creatinine sensing
Source: Royal Society of Chemistry journal article supplement (doi:10.1039/d4an00162a), 2024-01-01
Supplement: d4an00162a2.pdf [file d4an00162a2.pdf]

## Supplementary material

### **Rapid electrodeposition of Cu nanoparticles film on Ni foam as the integrated 3D free-standing electrode for noninvasive and nonenzymatic creatinine sensing**

Hongming Hou<sup>a,b</sup>, Yifan Liu<sup>c</sup>, Xianglong Li<sup>a,b,\*</sup>, Wenbo Liu<sup>a</sup>, and Xiaoli Gong<sup>d</sup>

<sup>a</sup> *School of Mechanical Engineering, Sichuan University, Chengdu 610065, China*

<sup>b</sup> *Sichuan Provincial Key Laboratory of Innovative Design of Electromechanical Equipment and Products, Chengdu 610065, China*

<sup>c</sup> *School of Materials and Energy, University of Electronic Science and Technology of China, Chengdu 611731, China*

<sup>d</sup> *School of Materials Science and Engineering, Sichuan University, Chengdu 610065, China*

\*Corresponding author. *E-mail address:* lxlnlnc@163.com (X . Li).

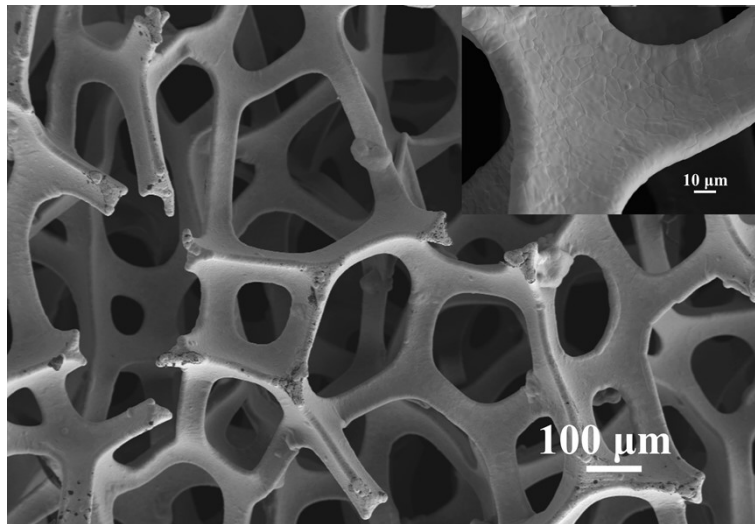

**Figure S1.** SEM image of bare NF.

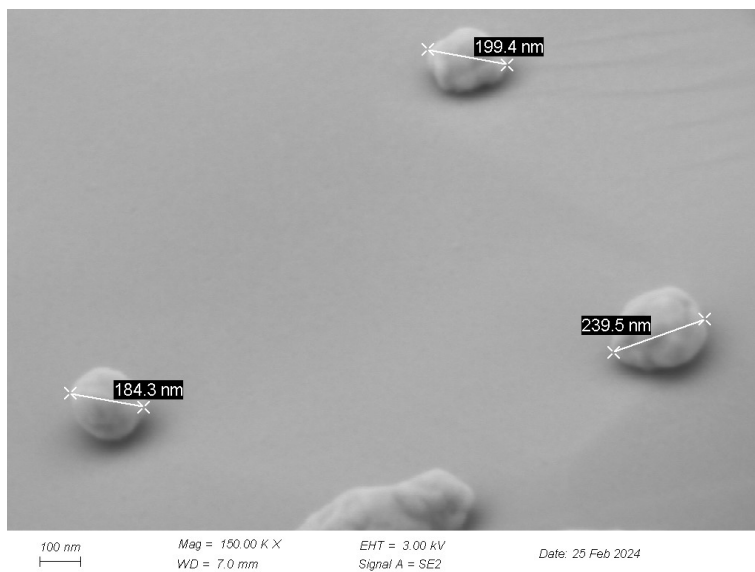

**Figure S2.** High-resolution SEM images of Cu nanoparticles electrodeposited on nickel foam for 10 s.

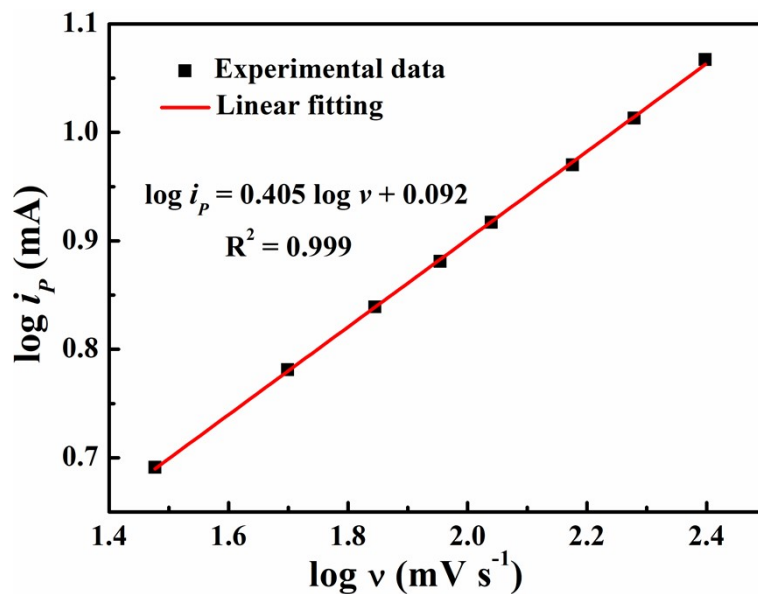

**Figure S3.** Dependence of logarithm of peak current on the logarithm of scan rate for 1.25 mM creatinine in 0.1 M PBS (pH 7.0) at Cu NPs film/NF electrode.

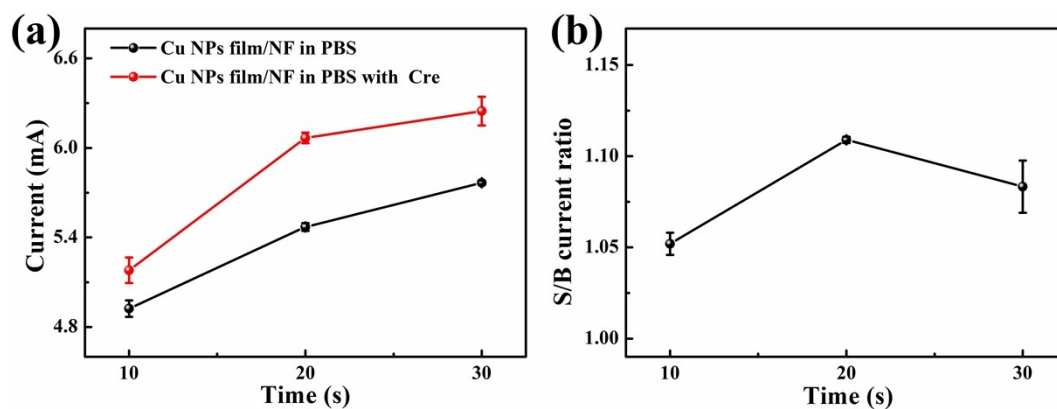

**Figure S4.** S/B current ratios were obtained from cyclic voltammograms of Cu NPs film/NF sensing electrodes prepared at different electrodeposition times (10s, 20s, and 30s) in 0.1 M PBS for 1.25 mM creatinine detection.

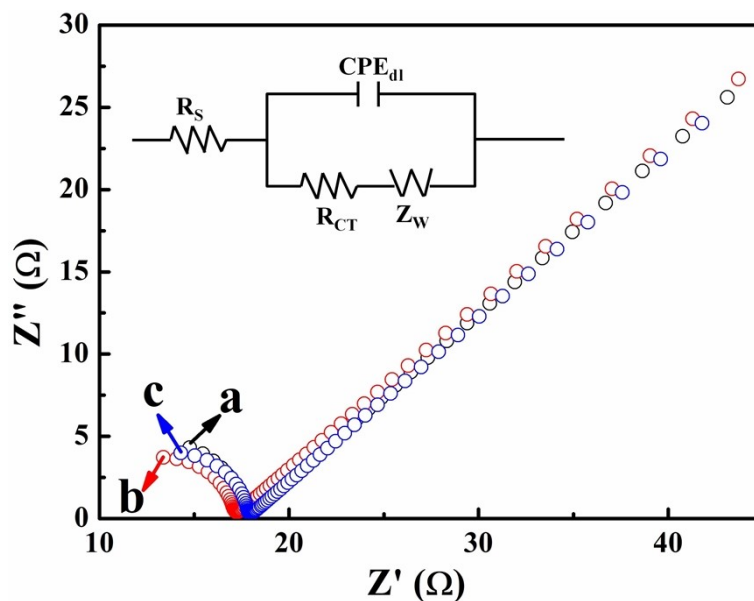

**Figure. S5** EIS of Cu NPs film/NF electrodes prepared by electrodeposition for 10 s (a), 20 s (b), and 30 s (c) were carried out in an electrolyte solution containing 5 mM  $[\text{Fe}(\text{CN})_6]^{3-/4-}$  and 0.1 M KCl. (Inset:Equivalent circuit model used for EIS fitting, which includes the ohmic resistance of the electrolyte ( $R_s$ ), the double-layer capacitance ( $\text{CPE}_{dl}$ ), the charge-transfer resistance ( $R_{ct}$ ), and the Warburg impedance ( $Z_w$ ). The diameters of the semicircular arcs in the high-frequency region denote the charge-transfer impedance, while the straight lines in the low-frequency region denote the substance-transfer impedance.)

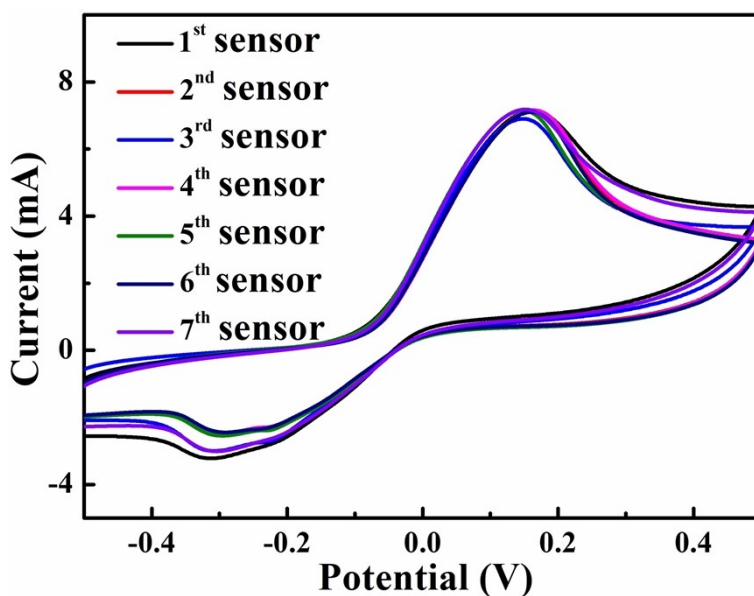

**Figure S6.** CV curves of seven sensors were prepared under the same growth parameters for the detection of 5 mM creatinine.

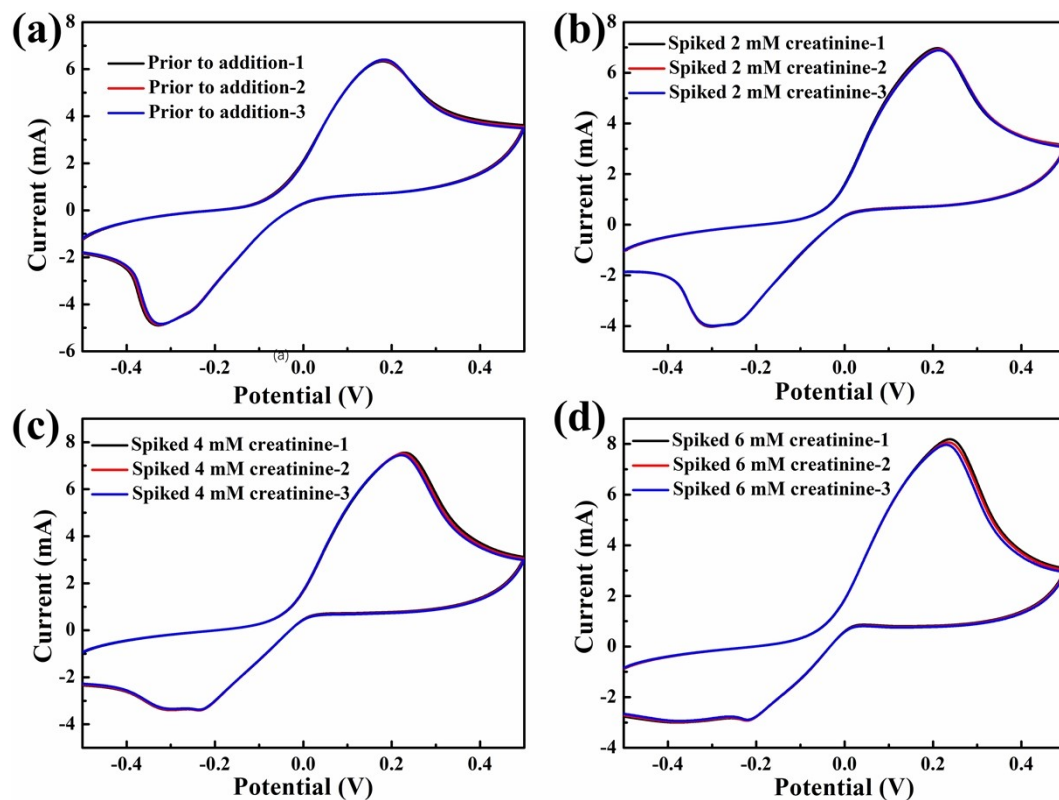

**Figure S7.** CV curves of diluted urine without standard addition (a), with the addition of 2 mM creatinine (b), with the addition of 4 mM creatinine (c), and with the addition of 6 mM creatinine (d) were measured using Cu NPs film/NF electrode.
